# Supplementary material
Source: Hindawi journal article supplement (doi:10.1155/2012/128705)
Supplement: f1 [file 128705.f1.pdf]

## Supplementary information

```
ATG GCT AAA GCC AAG TTT GAA CGT AAT AAA CCA CAC GTA AAC GTG GGT ACA ATC GGT
CAC GTT GAC CAT GGT AAA ACA ACT TTA ACT GCT GCG ATT GCA ACA ATT TGT GCA AAA ACT
TAC GGC GGT GAA GCG AAA GAT TAC TCA CAA ATC GAC TCA GCA CCT GAA GAA AAA GCA CGT
GGT ATT ACA ATT AAT ACA TCA CAC GTA GAA TAC GAT TCT CCA ACT CGT CAC TAC GCA CAC
GTT GAC TGC CCA GGC CAC GCC GAC TAC GTT AAA AAC ATG ATC ACT GGT GCT GCT CAG ATG
GAC GGC GCG ATC CTT GTA TGT GCT GCA ACT GAC GGT CCA ATG CCA CAA ACT CGT GAG CAC
ATC CTT CTT TCT CGT CAG GTA GGT GTA CCT TAC ATC ATC GTA TTC TTA AAC AAA TGC GAC
CTT GTT GAT GAC GAA GAA TTA CTT GAA TTA GTA GAA ATG GAA GTA CGT GAA CTT CTT TCT
ACT TAT GAC TTC CCA GGT GAT GAC ACT CCA GTA ATC CGT GGT TCA GCT CTT GCA GCG CTT
AAC GGT GAA GCT GGT CCT TAC GGT GAA GAA TCA GTT CTT GCT CTT GTA GCA GCA CTT GAC
TCT TAC ATC CCA GAG CCA GAG CGT GCA ATC GAC AAA GCA TTC TTG ATG CCA ATC GAA GAC
GTA TTC TCA ATT TCT GGT CGT GGT ACA GTA GTA ACA GGC CGT GTT GAA GCT GGT ATC ATC
AAA GTT GGT GAA GAA GTA GAG ATC GTT GGT ATT AAA GAT ACA GTT AAA ACA ACT GTA ACT
GGC GTA GAA ATG TTC CGT AAA CTT CTT GAC GAA GGC CGT GCA GGT GAG AAC TGT GGT ATC
TTA CTT CGT GGT ACT AAG CGT GAA GAA GTA CAA CGT GGT CAA GTA CTT GCT AAA CCA GGT
ACA ATC AAG CCG CAC ACT AAA TTC GAC GCA GAA GTA TAC GTA CTT TCT AAA GAA GAA GGT
GGT CGT CAC ACT CCA TTC TTA AAT GGT TAC CGT CCA CAG TTC TAC TTC CGT ACA ACT GAC
GTA ACT GGT GCA ATC CAG TTG AAA GAA GGC GTT GAA ATG GTA ATG CCA GGT GAC AAC GTT
GAA ATG TCA GTA GAA TTA ATC CAC CCA ATC GCA ATG GAC CCA GGT CTA CGT TTT GCA ATC
CGT GAA GGT GGT CGT ACT GTA GGT GCT GGT GTT GTT GCT AAA GTA ACT GCA TAA
```

**Fig. S1. Sequences of the *A. baumannii* gene for EF-Tu.** *tufAa* of the *A. baumannii* 19606 strain was cloned and sequenced. Its sequences were compared with those of the 17978 strain, and 99.8% homology was found. The changes in two nucleotides were located in 1,032 and 1,137, highlighted by shadow and boldness.

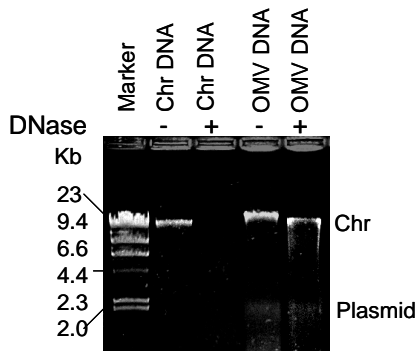

**Fig. S2. Electrophoresis analysis of *A. baumannii* OMV DNA.** OMV DNA was examined by agarose gel electrophoresis. OMV DNA consisted of chromosomal (chr) DNA (~23 kb) and small-sized DNA (~2 kb). The short DNA is likely to be plasmid, a prediction based on a previous report (15). DNase (0.005 U per  $\mu\text{g}$  DNA) was used to cleave extracellular DNA. Although the OMV chr DNA appeared partially cleaved, the OMV plasmid, albeit small and faint, was not fully degraded. One possible interpretation is that the plasmid DNA is enclosed in OMVs that protect the DNA from DNase sufficiently as reported previously (15), while the chrDNA is associated with OMVs outwardly that provide partial protection as described before (10). DNA in OMVs is aligned with DNA-binding proteins detected in OMVs.

**Table S1 Proteins present only in OMV subproteome**

| Proteins in OMV fraction                                                                                                         | Score* | Mass  | Domains<br>SP <sup>†</sup> , TM <sup>§</sup> | Predicted functions                                      | Database ID                  |
|----------------------------------------------------------------------------------------------------------------------------------|--------|-------|----------------------------------------------|----------------------------------------------------------|------------------------------|
| 1. Succinyl-CoA synthetase subunit alpha [ <i>A. baumannii</i> SDF]                                                              | 272    | 30674 | n,TM                                         | TCA cycle                                                | <a href="#">gi 169632628</a> |
| 2. Hypothetical protein A1S_2710 [ <i>A. baumannii</i> ATCC 17978]                                                               | 223    | 42234 | n,TM                                         | TCA                                                      | <a href="#">gi 126642741</a> |
| 3. Malate dehydrogenase [ <i>A. baumannii</i> ATCC 17978]                                                                        | 148    | 32400 | n,TM                                         | Glycolysis                                               | <a href="#">gi 126643040</a> |
| 4. CsuE [ <i>A. baumannii</i> ]                                                                                                  | 139    | 36554 | SP,TM                                        | Type I pili assembly                                     | <a href="#">gi 37933551</a>  |
| 5. Branched-chain amino acid aminotransferase [ <i>A. baumannii</i> ACICU]                                                       | 131    | 34408 | n,TM                                         | Branched chain family amino acid metabolic process       | <a href="#">gi 184159475</a> |
| 6. Glutamate dehydrogenase [NAD(P)+ oxidoreductase protein [ <i>A. baumannii</i> ATCC 17978]                                     | 131    | 40128 | n,TM                                         | Arginine biosynthesis                                    | <a href="#">gi 126643149</a> |
| 7. Dihydrolipoamide succinyltransferase, component of 2-oxoglutarate dehydrogenase complex (E2) [ <i>Acinetobacter</i> sp. ADP1] | 127    | 43454 | n,TM                                         | TCA                                                      | <a href="#">gi 50085915</a>  |
| 8. ketol-acid reductoisomerase [ <i>A. baumannii</i> SDF]                                                                        | 122    | 36830 | n,n                                          | Amino-acid biosynthesis                                  | <a href="#">gi 169634382</a> |
| 9. Succinyl-CoA synthetase beta chain [ <i>A. baumannii</i> ATCC 17978]                                                          | 118    | 36757 | n,TM                                         | TCA                                                      | <a href="#">gi 126642749</a> |
| 10. L-glutamine synthetase [ <i>Novosphingobium aromaticivorans</i> DSM 12444]                                                   | 108    | 51875 | n,TM                                         | Glutamine biosynthetic process                           | <a href="#">gi 87199130</a>  |
| 11. Acyl-CoA dehydrogenase A [ <i>Acinetobacter</i> sp. M-1]                                                                     | 107    | 68279 | n,TM                                         | Oxidation reduction                                      | <a href="#">gi 21717403</a>  |
| 12. Methylcitrate synthase [ <i>A. baumannii</i> SDF]                                                                            | 106    | 43955 | n,TM                                         | TCA                                                      | <a href="#">gi 169632107</a> |
| 13. Dihydrolipoamide S-acetyltransferase E2 component of the pyruvate dehydrogenase complex [ <i>A. baumannii</i> ATCC 17978]    | 104    | 64889 | n,TM                                         | Glycolysis                                               | <a href="#">gi 126643334</a> |
| 14. Glutaminase-asparaginase [ <i>A. baumannii</i> ATCC 17978]                                                                   | 101    | 31037 | SP, TM                                       | Asparagine metabolic process                             | <a href="#">gi 126641512</a> |
| 15. Putative UTP-glucose-1-phosphate uridylyltransferase [ <i>A. baumannii</i> ATCC 17978]                                       | 100    | 29032 | n,n                                          | Biosynthetic process                                     | <a href="#">gi 126640175</a> |
| 16. AdeK [ <i>A. baumannii</i> ATCC 17978]                                                                                       | 98     | 50128 | SP, TM                                       | Transporter                                              | <a href="#">gi 126642768</a> |
| 17. Polynucleotide phosphorylase [ <i>A. baumannii</i> ATCC 17978]                                                               | 98     | 71168 | n,TM                                         | mRNA catabolic process                                   | <a href="#">gi 126640439</a> |
| 18. Integration host factor subunit alpha [ <i>A. baumannii</i> ATCC 17978]                                                      | 97     | 10339 | n,n                                          | DNA recombination, transcription, translation regulation | <a href="#">gi 126640672</a> |
| 19. Aspartate-semialdehyde dehydrogenase [ <i>A. baumannii</i> ATCC 17978]                                                       | 96     | 40542 | n,TM                                         | Amino-acid biosynthesis                                  | <a href="#">gi 126640500</a> |
| 20. Malic enzyme [ <i>A. baumannii</i> SDF]                                                                                      | 94     | 82742 | n,TM                                         | Oxidation reduction                                      | <a href="#">gi 169632939</a> |
| 21. Glyceraldehyde-3-phosphate dehydrogenase [ <i>A. baumannii</i> ATCC 17978]                                                   | 88     | 49788 | n,n                                          | Glycolysis                                               | <a href="#">gi 126642537</a> |
| 22. Hypothetical protein A1S_0097 [ <i>A. baumannii</i> ATCC 17978]                                                              | 85     | 13056 | n,n                                          | Unknown                                                  | <a href="#">gi 126640204</a> |
| 23. Hypothetical protein ACICU_01297 [ <i>A. baumannii</i> ACICU]                                                                | 78     | 55249 | n,TM                                         | Unknown                                                  | <a href="#">gi 184157617</a> |
| 24. Dihydrolipoamide dehydrogenase [ <i>Psychrobacter arcticus</i> 273-4]                                                        | 75     | 51110 | n,TM                                         | Redox homeostasis                                        | <a href="#">gi 71064685</a>  |
| 25. Succinylarginine dihydrolase [ <i>A. baumannii</i> ATCC 17978]                                                               | 75     | 49834 | n,n                                          | Arginine metabolism                                      | <a href="#">gi 162286718</a> |
| 26. DNA-binding protein HU-beta [ <i>A. baumannii</i> ATCC 17978]                                                                | 68     | 9316  | n,n                                          | Bacterial histone-like protein family.                   | <a href="#">gi 126641682</a> |
| 27. N-acetyl-gamma-glutamyl-phosphate reductase [ <i>A. baumannii</i> ATCC 17978]                                                | 68     | 33392 | n,TM                                         | Arginine biosynthesis                                    | <a href="#">gi 126641958</a> |
| 28. Leucyl aminopeptidase [ <i>A. baumannii</i> ATCC 17978]                                                                      | 67     | 45775 | n,TM                                         | proteolysis                                              | <a href="#">gi 126640320</a> |

|     |                                                                                                               |    |        |        |                                 |                              |
|-----|---------------------------------------------------------------------------------------------------------------|----|--------|--------|---------------------------------|------------------------------|
| 29. | Bifunctional succinylornithine transaminase [ <i>Yersinia pseudotuberculosis</i> IP 32953]                    | 66 | 44188  | n, TM  | Arginine metabolism             | <a href="#">gi 51596285</a>  |
| 30. | (3R)-hydroxymyristoyl-ACP dehydratase [ <i>A. baumannii</i> ATCC 17978]                                       | 65 | 16335  | n, TM  | Lipid A biosynthesis            | <a href="#">gi 126642011</a> |
| 31. | 6,7-dimethyl-8-ribityllumazine synthase [ <i>Acinetobacter</i> sp. ADP1]                                      | 65 | 16411  | n, n   | Riboflavin biosynthesis         | <a href="#">gi 50086524</a>  |
| 32. | Acetyl-CoA acyltransferase [ <i>A. baumannii</i> SDF]                                                         | 63 | 41062  | n, TM  | Lipid degradation               | <a href="#">gi 169634579</a> |
| 33. | Biotin carboxyl carrier protein of acetyl-CoA carboxylase (BCCP) [ <i>A. baumannii</i> ATCC 17978]            | 63 | 13235  | n, TM  | Fatty acid biosynthetic process | <a href="#">gi 126642055</a> |
| 34. | Putative UDP-glucose 4-epimerase [ <i>A. baumannii</i> ATCC 17978]                                            | 62 | 31131  | SP, TM | Galactose metabolic process     | <a href="#">gi 126640178</a> |
| 35. | Aspartate carbamoyltransferase catalytic subunit [ <i>Polaromonas</i> sp. JS666]                              | 61 | 34659  | n, TM  | Pyrimidine biosynthesis         | <a href="#">gi 91787042</a>  |
| 36. | $\beta$ -ketoacyl-ACP synthase 1 [ <i>A. baumannii</i> ATCC 17978]                                            | 61 | 28728  | n, TM  | Biosynthetic process            | <a href="#">gi 126640913</a> |
| 37. | Cysteine synthase A [ <i>A. baumannii</i> SDF]                                                                | 61 | 35111  | n, TM  | Cysteine biosynthesis           | <a href="#">gi 169632185</a> |
| 38. | 2-C-methyl-D-erythritol 2,4-cyclodiphosphate synthase [ <i>Leifsonia xyli</i> subsp. <i>xyli</i> str. CTCB07] | 60 | 39273  | n, TM  | Isoprene biosynthesis           | <a href="#">gi 50955383</a>  |
| 39. | Arsenate reductase [ <i>Rhodopseudomonas palustris</i> HaA2]                                                  | 59 | 16396  | n, TM  | Oxidation reduction             | <a href="#">gi 86749094</a>  |
| 40. | Hypothetical protein LJ0783 [ <i>Lactobacillus johnsonii</i> NCC 533]                                         | 56 | 62619  | n, TM  | ATP biosynthetic process        | <a href="#">gi 42518708</a>  |
| 41. | Malate:quinone oxidoreductase [ <i>A. baumannii</i> ATCC 17978]                                               | 55 | 60397  | SP, TM | TCA                             | <a href="#">gi 162286745</a> |
| 42. | 30S ribosomal protein S13 [ <i>Acinetobacter</i> sp. ADP1]                                                    | 54 | 13141  | n, n   | Translation                     | <a href="#">gi 50086193</a>  |
| 43. | Hypothetical protein glr1304 [ <i>Gloeobacter violaceus</i> PCC 7421]                                         | 54 | 96551  | n, TM  | TonB box                        | <a href="#">gi 37520873</a>  |
| 44. | Hypothetical protein FP1533 [Flavobacterium psychrophilum JIP02/86]                                           | 53 | 84894  | n, n   | Unknown                         | <a href="#">gi 150025584</a> |
| 45. | Tral nickase/helicase [ <i>Yersinia pestis</i> ]                                                              | 51 | 188825 | n, n   | Conjugation                     | <a href="#">gi 52788159</a>  |
| 46. | L-asparaginase, type II [ <i>Clostridium botulinum</i> A str. ATCC 3502]                                      | 51 | 36511  | n, n   | Amino acid metabolic process    | <a href="#">gi 148380471</a> |
| 47. | CoA-substrate-specific enzyme activase domain-containing protein [ <i>Campylobacter curvus</i> 525.92]        | 50 | 156226 | n, n   | Unknown                         | <a href="#">gi 154173735</a> |
| 48. | Hypothetical protein CPF_2364 [ <i>Clostridium perfringens</i> ATCC 13124]                                    | 50 | 122950 | SP, TM | Unknown                         | <a href="#">gi 110799698</a> |
| 49. | Predicted 3',5'-cyclic-nucleotide phosphodiesterase [uncultured bacterium BAC13K9BAC]                         | 50 | 29015  | n, n   | cAMP phosphodiesterase activity | <a href="#">gi 68304930</a>  |

<sup>\*</sup>, Score is based on *P* that is  $\leq 0.05$ ; <sup>‡</sup>, signal peptide; <sup>§</sup>, transmembrane domains.

**Table S2 Proteins shared by OMV and OM subproteomes**

| Common proteins in both OMV and OM fractions                       | Score*<br>OM/OMV | Mass  | Domain<br>SP <sup>‡</sup> , TM <sup>§</sup> | Predicted function          | Database ID                  |
|--------------------------------------------------------------------|------------------|-------|---------------------------------------------|-----------------------------|------------------------------|
| 50. Putative protein (DcaP-like) [ <i>A. baumannii</i> ATCC 17978] | 1889/522         | 44818 | SP, TM                                      | Unknown                     | <a href="#">gi 126642784</a> |
| 51. OmpA [ <i>A. baumannii</i> ATCC 17978]                         | 1737/240         | 37342 | SP, TM                                      | Porin                       | <a href="#">gi 169632583</a> |
| 52. CsuA/B [ <i>A. baumannii</i> AYE]                              | 750/1885         | 18694 | SP, TM                                      | Type I pili assembly        | <a href="#">gi 50083922</a>  |
| 53. 23 kDa OMP putative [ <i>A. baumannii</i> ATCC 17978]          | 659/74           | 22472 | SP, TM                                      | <a href="#">OmpA family</a> | <a href="#">gi 126640934</a> |

|     |                                                                                                                         |         |       |       |                                                   |                              |
|-----|-------------------------------------------------------------------------------------------------------------------------|---------|-------|-------|---------------------------------------------------|------------------------------|
| 54. | GroEL [ <i>A. baumannii</i> SDF]                                                                                        | 443/490 | 56886 | n,TM  | Chaperone                                         | <a href="#">gi 126642873</a> |
| 55. | 48 kDa OMP putative [ <i>A. baumannii</i> AYE]                                                                          | 349/116 | 47833 | SP,TM | Porin activity                                    | <a href="#">gi 160222634</a> |
| 56. | Major intrinsic multiple antibiotic resistance efflux outer membrane protein precursor [ <i>Acinetobacter</i> sp. ADP1] | 130/91  | 52747 | SP,TM | Transporter activity                              | <a href="#">gi 169632592</a> |
| 57. | Elongation factor Tu [ <i>A. baumannii</i> ATCC 17978]                                                                  | 100/53  | 42760 | n,n   | Protein biosynthesis                              | <a href="#">gi 184157280</a> |
| 58. | Putative signal peptide [ <i>A. baumannii</i> ATCC 17978]                                                               | 91/59   | 16557 | SP,TM | Unknown                                           | <a href="#">gi 169794337</a> |
| 59. | Glutamine synthetase [ <i>A. baumannii</i> ACICU]                                                                       | 86/132  | 52166 | n,TM  | Glutamine biosynthetic process                    | <a href="#">gi 126641619</a> |
| 60. | 30S ribosomal protein S7 [ <i>Acinetobacter</i> sp. ADP1]                                                               | 79/46   | 17614 | n, n  | Translation                                       | <a href="#">gi 126642245</a> |
| 61. | Catechol 1,2-dioxygenase [ <i>A. radioresistens</i> ]                                                                   | 77/55   | 33527 | n,n   | Catechol catabolic process                        | <a href="#">gi 126642195</a> |
| 62. | Oxidoreductase [ <i>A. baumannii</i> ATCC 17978]                                                                        | 77/39   | 23477 | n,TM  | Oxidoreductase activity                           | <a href="#">gi 50084093</a>  |
| 63. | ATP synthase subunit alpha [ <i>A. baumannii</i> ATCC 17978]                                                            | 72/100  | 55363 | n, TM | ATP synthesis coupled proton transport            | <a href="#">gi 183598067</a> |
| 64. | ATP synthase subunit beta [ <i>Acinetobacter</i> sp. ADP1]                                                              | 71/108  | 50280 | n,n   | ATP synthesis coupled proton Transport            | <a href="#">gi 16118478</a>  |
| 65. | Putative RND type efflux pump (AdeT) [ <i>Acinetobacter</i> sp. ADP1]                                                   | 71/142  | 36705 | SP,TM | Efflux pump involved in aminoglycoside resistance | <a href="#">gi 50083469</a>  |
| 66. | Aspartate aminotransferase A [ <i>A. baumannii</i> ATCC 17978]                                                          | 66/117  | 40652 | n, TM | Biosynthetic process, aminotransferase            | <a href="#">gi 169795946</a> |
| 67. | Succinylglutamic semialdehyde dehydrogenase [ <i>Burkholderia pseudomallei</i> K96243]                                  | 56/61   | 51806 | n,n   | Arginine catabolic process                        | <a href="#">gi 126642261</a> |
| 68. | RecF [ <i>Halorhodospira halophila</i> SL1]                                                                             | 56/42   | 39466 | n,n   | DNA replication and repair                        | <a href="#">gi 126641943</a> |
| 69. | CsuB [ <i>A. baumannii</i> ATCC 17978]                                                                                  | 56/56   | 14678 | SP,TM | Type I pili assembly                              | <a href="#">gi 50083793</a>  |
| 70. | GlcD [uncultured marine bacterium]                                                                                      | 51/35   | 33668 | n,n   | Oxidoreductase activity                           | <a href="#">gi 168699716</a> |
| 71. | AtpA [uncultured <i>Geobacter</i> sp.]                                                                                  | 47/51   | 29023 | n,TM  | ATP synthesis coupled proton transport            | <a href="#">gi 34558039</a>  |
| 72. | 50S ribosomal protein L2 [ <i>Acinetobacter</i> sp. ADP1]                                                               | 43/63   | 30294 | n,n   | Translation                                       | <a href="#">gi 126642262</a> |
| 73. | CsuA [ <i>A. baumannii</i> ATCC 17978]                                                                                  | 43/64   | 16058 | SP,TM | Type I pili assembly                              | <a href="#">gi 218961916</a> |
| 74. | Putative acetyl-CoA acetyltransferase [ <i>A. baumannii</i> AYE]                                                        | 41/99   | 40774 | n,TM  | Acetyl-CoA C-acetyltransferase activity           | <a href="#">gi 150389285</a> |
| 75. | 50S ribosomal protein L9 [ <i>Acinetobacter</i> sp. ADP1]                                                               | 40/89   | 15775 | n,n   | Translation                                       | <a href="#">gi 94499932</a>  |

<sup>\*</sup>, Score is based on *P* that is  $\leq 0.05$ ; <sup>‡</sup>, signal peptide; <sup>§</sup>, transmembrane domains.

**Table S3 Proteins detected only in OM subproteome**

| Proteins in OM fraction                                                             | Score <sup>*</sup> | Mass  | Domains<br>SP <sup>‡</sup> , TM <sup>§</sup> | Predicted functions      | Database ID                  |
|-------------------------------------------------------------------------------------|--------------------|-------|----------------------------------------------|--------------------------|------------------------------|
| 76. AdeC-like OMP [ <i>A. baumannii</i> AYE]                                        | 658                | 52901 | SP,TM                                        | Transport, lipid binding | <a href="#">gi 126640934</a> |
| 77. 34 kDa OMP [ <i>A. baumannii</i> ACICU]                                         | 599                | 32095 | SP,TM                                        | Cell OM                  | <a href="#">gi 50085972</a>  |
| 78. Glucose-sensitive porin (OprB-like), putative [ <i>A. baumannii</i> ATCC 17978] | 463                | 42919 | SP,TM                                        | Transporter              | <a href="#">gi 126643304</a> |
| 79. Hypothetical protein ABSDF0721 [ <i>A. baumannii</i> SDF]                       | 460                | 47029 | SP,TM                                        | Unknown                  | <a href="#">gi 126642784</a> |
| 80. Hypothetical protein ABSDF2360 [ <i>A. baumannii</i> SDF]                       | 333                | 41181 | SP,TM                                        | Unknown                  | <a href="#">gi 169797605</a> |

|      |                                                                                                                                  |     |        |       |                                             |                              |
|------|----------------------------------------------------------------------------------------------------------------------------------|-----|--------|-------|---------------------------------------------|------------------------------|
| 81.  | CsuD [ <i>A. baumannii</i> ATCC 19606]                                                                                           | 244 | 92613  | SP,TM | Fimbrium biogenesis                         | <a href="#">gil72535027</a>  |
| 82.  | OM receptor protein [ <i>A. baumannii</i> ACICU]                                                                                 | 238 | 82433  | SP,TM | Fe transport                                | <a href="#">gil260554509</a> |
| 83.  | Elongation factor Ts [ <i>A. baumannii</i> ATCC 17978]                                                                           | 212 | 30691  | n,n   | Protein biosynthesis                        | <a href="#">gil72535025</a>  |
| 84.  | Hypothetical protein BACUNI_00110 [ <i>Bacteroides uniformis</i> ATCC 8492]                                                      | 204 | 66417  | n,TM  | Arabinose catabolism                        | <a href="#">gil126642362</a> |
| 85.  | OM receptor for monomeric catechols [ <i>A. baumannii</i> ACICU]                                                                 | 202 | 81197  | SP,TM | Siderophore-iron transmembrane transporter  | <a href="#">gil160887709</a> |
| 86.  | ComL, putative [ <i>A. baumannii</i> ATCC 17978]                                                                                 | 189 | 40583  | SP,TM | Competence protein                          | <a href="#">gil184156805</a> |
| 87.  | Long-chain fatty acid ABC transporter [ <i>A. baumannii</i> ACICU]                                                               | 178 | 53090  | n,TM  | Short-chain fatty acid transporter activity | <a href="#">gil126640892</a> |
| 88.  | Electron transfer flavoprotein alpha-subunit [ <i>A. baumannii</i> SDF]                                                          | 146 | 31492  | n,TM  | Electron carrier activity                   | <a href="#">gil169794882</a> |
| 89.  | Hypothetical protein ABSDF1556 [ <i>A. baumannii</i> SDF]                                                                        | 141 | 35019  | SP,TM | Unknown                                     | <a href="#">gil169632682</a> |
| 90.  | 50S ribosomal protein L4 [ <i>Acinetobacter</i> sp. ADP1]                                                                        | 133 | 22084  | n,n   | Translation                                 | <a href="#">gil169633229</a> |
| 91.  | Urocanase [ <i>A. baumannii</i> ATCC 17978]                                                                                      | 108 | 45525  | n,TM  | Histidine catabolic process                 | <a href="#">gil50086214</a>  |
| 92.  | Hypothetical protein ABAYE2569 [ <i>A. baumannii</i> AYE]                                                                        | 105 | 11220  | SP,TM |                                             | <a href="#">gil126643414</a> |
| 93.  | Peptidoglycan-associated lipoprotein precursor [ <i>A. baumannii</i> ATCC 17978]                                                 | 105 | 18215  | SP,TM | Cell wall                                   | <a href="#">gil169796592</a> |
| 94.  | Hypothetical protein ACICU_00960 [ <i>A. baumannii</i> ACICU]                                                                    | 102 | 53061  | SP,TM | Unknown                                     | <a href="#">gil126642630</a> |
| 95.  | Glutathione peroxidase [ <i>A. baumannii</i> ATCC 17978]                                                                         | 97  | 20138  | n,n   | Glutathione peroxidase activity             | <a href="#">gil50083988</a>  |
| 96.  | MTA/SAH nucleosidase, putative [ <i>Acinetobacter</i> sp. ADP1]                                                                  | 97  | 31412  | SP,TM | Amino-acid biosynthesis                     | <a href="#">gil126666815</a> |
| 97.  | Putative aromatic compound porin [ <i>A. baumannii</i> AYE]                                                                      | 95  | 47905  | SP,TM | Porin activity                              | <a href="#">gil126640260</a> |
| 98.  | OMP W, putative [ <i>A. baumannii</i> SDF]                                                                                       | 93  | 23123  | SP,TM | Unknown                                     | <a href="#">gil169795795</a> |
| 99.  | Hypothetical protein ABAYE0137 [ <i>A. baumannii</i> AYE]                                                                        | 92  | 28124  | SP,TM | Unknown                                     | <a href="#">gil126642014</a> |
| 100. | Hypothetical protein A1S_3051 [ <i>A. baumannii</i> ATCC 17978]                                                                  | 91  | 33668  | SP,TM | Unknown                                     | <a href="#">gil126641100</a> |
| 101. | Electron transfer flavoprotein beta-subunit [ <i>A. baumannii</i> ATCC 17978]                                                    | 89  | 23050  | n,n   | Electron carrier activity                   | <a href="#">gil126643237</a> |
| 102. | Two-component response regulator [ <i>A. baumannii</i> ATCC 17978]                                                               | 89  | 22493  | n,n   | Two-component signal transduction           | <a href="#">gil169634030</a> |
| 103. | Hypothetical protein A1S_1574 [ <i>A. baumannii</i> ATCC 17978]                                                                  | 87  | 9353   | SP,TM | Unknown                                     | <a href="#">gil126642663</a> |
| 104. | 50S ribosomal protein L15 [ <i>Acinetobacter</i> sp. ADP1]                                                                       | 85  | 15419  | n,n   | Translation                                 | <a href="#">gil184158870</a> |
| 105. | Alkyl hydroperoxide reductase, C22 subunit, thioredoxin-like (detoxification of hydroperoxides) [ <i>Acinetobacter</i> sp. ADP1] | 85  | 20715  | n,n   | Redox homeostasis                           | <a href="#">gil50086196</a>  |
| 106. | NADH-dependent enoyl-ACP reductase [ <i>A. baumannii</i> ATCC 17978]                                                             | 84  | 28626  | n,TM  | Fatty acid biosynthetic process             | <a href="#">gil50085223</a>  |
| 107. | OmpH, putative [ <i>A. baumannii</i> ATCC 17978]                                                                                 | 81  | 17857  | SP,TM | Protein binding                             | <a href="#">gil149369942</a> |
| 108. | 30S ribosomal protein S8 [ <i>Acinetobacter</i> sp. ADP1]                                                                        | 80  | 14146  | n,n   | Translation                                 | <a href="#">gil126642013</a> |
| 109. | L-sorbose dehydrogenase [ <i>A. baumannii</i> ATCC 17978]                                                                        | 79  | 43072  | SP,TM | Catalytic activity                          | <a href="#">gil126640348</a> |
| 110. | Hypothetical protein A1S_1879 [ <i>A. baumannii</i> ATCC 17978]                                                                  | 76  | 15550  | SP,TM | Unknown                                     | <a href="#">gil10440998</a>  |
| 111. | 30S ribosomal protein S9 [ <i>Acinetobacter</i> sp. ADP1]                                                                        | 75  | 14263  | n,n   | Translation                                 | <a href="#">gil126641924</a> |
| 112. | PapD [ <i>A. baumannii</i> ACICU]                                                                                                | 74  | 30596  | SP,TM | P pilus assembly chaperone                  | <a href="#">gil50086030</a>  |
| 113. | AdeB RND protein [ <i>Acinetobacter baumannii</i> ]                                                                              | 72  | 112542 | n,TM  | Transporter activity                        | <a href="#">gil162286757</a> |
| 114. | 50S ribosomal protein L5 [ <i>Coxiella burnetii</i> RSA 493]                                                                     | 68  | 20735  | n,n   | Translation                                 | <a href="#">gil50083305</a>  |
| 115. | Siderophore receptor, putative [ <i>A. baumannii</i> ATCC 17978]                                                                 | 67  | 55201  | n,TM  | Transporter activity                        | <a href="#">gil29653602</a>  |
| 116. | OM usher protein, putative [ <i>A. baumannii</i> AYE]                                                                            | 66  | 94546  | SP,TM | Transporter activity                        | <a href="#">gil126642125</a> |
| 117. | Indole-3-glycerol-phosphate synthase [ <i>A. baumannii</i> SDF]                                                                  | 65  | 29909  | n,n   | Aromatic amino acid biosynthesis            | <a href="#">gil126642544</a> |

|                                                                                                                |    |       |       |                                              |                              |
|----------------------------------------------------------------------------------------------------------------|----|-------|-------|----------------------------------------------|------------------------------|
| 118. Dienelactone hydrolase, putative [ <i>A. baumannii</i> ATCC 17978]                                        | 64 | 19173 | n,n   | Hydrolase activity                           | <a href="#">gi 169632923</a> |
| 119. Hypothetical protein A1S_0505 [ <i>A. baumannii</i> ATCC 17978]                                           | 64 | 36477 | SP,TM | Unknown                                      | <a href="#">gi 126643437</a> |
| 120. Serine/threonine transporter SstT [ <i>A. baumannii</i> ATCC 17978]                                       | 63 | 32591 | n,TM  | Amino acid transport                         | <a href="#">gi 49617981</a>  |
| 121. Hypothetical protein N9414_21524 [ <i>Nodularia spumigena</i> CCY9414]                                    | 62 | 56954 | n,n   | Unknown                                      | <a href="#">gi 126641583</a> |
| 122. Rod shape-determining protein [ <i>Acinetobacter</i> sp. ADP1]                                            | 62 | 36755 | n,TM  | Cell morphogenesis                           | <a href="#">gi 119513654</a> |
| 123. Lipoprotein, putative [ <i>A. baumannii</i> ATCC 17978]                                                   | 61 | 24108 | SP,TM | Lipoprotein                                  | <a href="#">gi 50084039</a>  |
| 124. Bifunctional aconitate hydratase 2/2-methylisocitrate dehydratase [ <i>Pseudomonas aeruginosa</i> PAO1]   | 58 | 93569 | n,TM  | Lyase                                        | <a href="#">gi 160935071</a> |
| 125. Hypothetical protein STM2315 [ <i>Salmonella typhimurium</i> LT2]                                         | 58 | 64600 | n,TM  | Unknown                                      | <a href="#">gi 73531089</a>  |
| 126. Nucleoside diphosphate kinase (NDK) (NDP kinase) (nucleoside-2-P kinase) [ <i>Acinetobacter</i> sp. ADP1] | 57 | 15438 | n,TM  | Nucleotide metabolism                        | <a href="#">gi 161523490</a> |
| 127. Hypothetical protein CPn0336 [ <i>Chlamydomonas pneumoniae</i> CWL029]                                    | 56 | 35334 | SP,TM | Thiamine biosynthesis                        | <a href="#">gi 118558</a>    |
| 128. Hypothetical protein ROS217_02710 [ <i>Roseovarius</i> sp. 217]                                           | 56 | 79867 | n,TM  | Methyltransferase activity                   | <a href="#">gi 126643008</a> |
| 129. Pantoate-beta-alanine ligase [ <i>Helicobacter hepaticus</i> ATCC 51449]                                  | 56 | 31207 | n, n  | Pantothenate biosynthesis                    | <a href="#">gi 53719993</a>  |
| 130. Phosphopyruvate hydratase [ <i>A. baumannii</i> ATCC 17978]                                               | 56 | 42941 | n,TM  | Glycolysis, cell surface                     | <a href="#">gi 15618256</a>  |
| 131. Quinoprotein glucose dehydrogenase A                                                                      | 56 | 86902 | SP,TM | Oxidation reduction                          | <a href="#">gi 85707540</a>  |
| 132. 3-oxoacyl-[acyl-carrier-protein] synthase III [ <i>Pedobacter</i> sp. BAL39]                              | 55 | 35569 | n,TM  | Lipid synthesis                              | <a href="#">gi 86559631</a>  |
| 133. 50S ribosomal protein L10 [ <i>A. baumannii</i> SDF]                                                      | 55 | 18079 | n,n   | Translation                                  | <a href="#">gi 149277213</a> |
| 134. Acyl-CoA synthetase [ <i>Clostridium perfringens</i> ]                                                    | 55 | 56370 | n,TM  | Fatty acid catabolism                        | <a href="#">gi 121998015</a> |
| 135. Bifunctional aldehyde dehydrogenase/enoyl-CoA hydratase [ <i>A. baumannii</i> ATCC 17978]                 | 53 | 69794 | n,TM  | Oxidation reduction                          | <a href="#">gi 24375681</a>  |
| 136. Major OMP 1 [ <i>Chlamydia trachomatis</i> ]                                                              | 53 | 42867 | SP,TM | Porin activity                               | <a href="#">gi 126641381</a> |
| 137. AraC family transcriptional regulator [ <i>Pseudomonas mendocina</i> ymp]                                 | 52 | 20399 | n,n   | Transcription regulation                     | <a href="#">gi 16330496</a>  |
| 138. Hypothetical protein ANACOL_00094 [ <i>Anaerotruncus colihominis</i> DSM 17241]                           | 52 | 48918 | n,TM  | Protein biosynthesis                         | <a href="#">gi 149924971</a> |
| 139. Acetyl-CoA hydrolase [ <i>Shewanella denitrificans</i> OS217]                                             | 51 | 44835 | n,TM  | Acetyl-CoA metabolic process                 | <a href="#">gi 168703700</a> |
| 140. Bacitracin resistance protein BacA [ <i>Gemmata obscuriglobus</i> UQM 2246]                               | 51 | 29255 |       | Bacitracin resistance                        | <a href="#">gi 167768777</a> |
| 141. Hypothetical protein ABAYE2389 [ <i>A. baumannii</i> AYE]                                                 | 51 | 15768 | SP,TM | Serine-type endopeptidase inhibitor activity | <a href="#">gi 112981082</a> |
| 142. Nitrite reductase [ <i>Gemmata obscuriglobus</i> UQM 2246]                                                | 51 | 87173 |       | Nitrate usage                                | <a href="#">gi 169796428</a> |
| 143. Major facilitator transporter [ <i>Enterobacter</i> sp. 638]                                              | 50 | 44786 | n,TM  | Multidrug efflux pumps                       | <a href="#">gi 126640887</a> |
| 144. Ribonuclease HII [ <i>Chlamydomonas pneumoniae</i> AR39]                                                  | 50 | 33573 | n,n   | Endonuclease                                 | <a href="#">gi 146311149</a> |

<sup>\*</sup>, Score is based on *P* that is  $\leq 0.05$ ; <sup>‡</sup>, signal peptide; <sup>§</sup>, transmembrane domains.
